# Supplementary material for: Time trends in pediatric fracture incidence in Sweden during the period 1950–2006
Source: PubMed Central journal article supplement — Acta Orthop. 2017 May 31;88(4):440–5. doi: 10.1080/17453674.2017.1334284 (PMC5499338; doi:10.1080/17453674.2017.1334284), 2017-05-31
Supplement: IORT_A_1334284_SM7022.pdf [file IORT_A_1334284_SM7022.pdf]

## Supplementary data

Table 1. Fracture distribution in Malmö children < 17 years old, in the period 2005–2006. The data are presented as absolute numbers, incidence per 10<sup>5</sup> person-years, and proportion (%) of all fractures

|                         | All Children |           |            | Boys   |           |            | Girls  |           |            |
|-------------------------|--------------|-----------|------------|--------|-----------|------------|--------|-----------|------------|
|                         | Number       | Incidence | Proportion | Number | Incidence | Proportion | Number | Incidence | Proportion |
| ALL FRACTURES           | 1,692        | 1,832     | 100        | 1,119  | 2,359     | 100        | 573    | 1,276     | 100        |
| AXIAL                   | 28           | 30        | 1.7        | 18     | 38        | 1.6        | 10     | 22        | 1.7        |
| Face                    | 16           | 17        | 0.9        | 11     | 23        | 1.0        | 5      | 11        | 0.9        |
| Spine                   | 8            | 9         | 0.5        | 5      | 11        | 0.4        | 3      | 7         | 0.5        |
| Pelvis                  | 4            | 4         | 0.2        | 2      | 4         | 0.2        | 2      | 5         | 0.3        |
| APPENDICULAR            | 1,664        | 1,802     | 98.3       | 1,101  | 2,321     | 98.4       | 563    | 1,254     | 98.3       |
| Upper extremity         | 1,334        | 1,445     | 78.8       | 894    | 1,885     | 79.9       | 440    | 980       | 76.8       |
| Scapula                 | 2            | 2         | 0.1        | 2      | 4         | 0.2        | 0      | 0         | 0.0        |
| Clavicle                | 114          | 124       | 6.7        | 75     | 158       | 6.7        | 39     | 87        | 6.8        |
| Humerus                 | 171          | 185       | 10.1       | 96     | 202       | 8.6        | 75     | 167       | 13.1       |
| Proximal                | 52           | 56        | 3.1        | 24     | 51        | 2.1        | 28     | 62        | 4.9        |
| Diaphyseal              | 15           | 16        | 0.9        | 9      | 19        | 0.8        | 6      | 13        | 1.0        |
| Distal                  | 104          | 113       | 6.1        | 63     | 133       | 5.6        | 41     | 91        | 7.2        |
| Forearm                 | 633          | 686       | 37.4       | 418    | 881       | 37.4       | 215    | 479       | 37.5       |
| Proximal                | 25           | 27        | 1.5        | 17     | 36        | 1.5        | 8      | 18        | 1.4        |
| Diaphyseal              | 87           | 94        | 5.1        | 60     | 126       | 5.4        | 27     | 60        | 4.7        |
| Distal                  | 521          | 564       | 30.8       | 341    | 719       | 30.5       | 180    | 401       | 31.4       |
| Hand                    | 414          | 448       | 24.5       | 303    | 639       | 27.1       | 111    | 247       | 19.4       |
| Carpal or metacarpal    | 167          | 181       | 9.9        | 144    | 304       | 12.9       | 23     | 51        | 4.0        |
| Finger                  | 247          | 268       | 14.6       | 159    | 335       | 14.2       | 88     | 196       | 15.4       |
| Lower extremity         | 330          | 357       | 19.5       | 207    | 436       | 18.5       | 123    | 274       | 21.5       |
| Femur                   | 22           | 24        | 1.3        | 13     | 27        | 1.2        | 9      | 20        | 1.6        |
| Proximal                | 2            | 2         | 0.1        | 1      | 2         | 0.1        | 1      | 2         | 0.2        |
| Diaphyseal              | 16           | 17        | 0.9        | 8      | 17        | 0.7        | 8      | 18        | 1.4        |
| Distal                  | 4            | 4         | 0.2        | 4      | 8         | 0.4        | 0      | 0         | 0.0        |
| Patella                 | 4            | 4         | 0.2        | 4      | 8         | 0.4        | 0      | 0         | 0.0        |
| Tibia                   | 132          | 143       | 7.8        | 80     | 169       | 7.1        | 52     | 116       | 9.1        |
| Proximal                | 9            | 10        | 0.5        | 5      | 11        | 0.4        | 4      | 9         | 0.7        |
| Diaphyseal              | 90           | 98        | 5.3        | 56     | 118       | 5.0        | 34     | 76        | 5.9        |
| Distal <sup>a</sup>     | 33           | 36        | 2.0        | 19     | 40        | 1.7        | 14     | 31        | 2.4        |
| Fibula                  | 30           | 33        | 1.8        | 22     | 46        | 2.0        | 8      | 18        | 1.4        |
| Proximal and diaphyseal | 6            | 7         | 0.4        | 6      | 13        | 0.5        | 0      | 0         | 0.0        |
| Distal                  | 24           | 26        | 1.4        | 16     | 34        | 1.4        | 8      | 18        | 1.4        |
| Ankle <sup>b</sup>      | 33           | 36        | 2.0        | 22     | 46        | 2.0        | 11     | 25        | 1.9        |
| Foot                    | 142          | 154       | 8.4        | 88     | 186       | 7.9        | 54     | 120       | 9.4        |
| Mid- and hindfoot       | 2            | 2         | 0.1        | 1      | 2         | 0.1        | 1      | 2         | 0.2        |
| Metatarsals             | 73           | 79        | 4.3        | 51     | 108       | 4.6        | 22     | 49        | 3.8        |
| Toe                     | 67           | 73        | 4.0        | 36     | 76        | 3.2        | 31     | 69        | 5.4        |

<sup>a</sup> 2 fractures involving both the medial and lateral malleoli were found in boys and are reported in the distal tibia category only (not distal fibula).

<sup>b</sup> Ankle fractures include fractures of the medial or lateral malleoli, bimalleolar fractures, and combined ankle fractures, and thus include some of the fractures in the distal fibula and distal tibia categories.

**Table 3. Etiology of pediatric fractures in Malmö, Sweden, 1950–2006, in relation to activity and trauma mechanism for the fractures for which the information was available. Data are presented as a proportion (%) of all fractures**

|                           | 1950–1955 | 1960–1965 | 1970–1975 | 1976–1979 | 1993–1994 | 2005–2006 |
|---------------------------|-----------|-----------|-----------|-----------|-----------|-----------|
| <b>ACTIVITY</b>           |           |           |           |           |           |           |
| Home                      | 5.3       | 5.7       | 6.3       | 4.5       | 6.9       | 1.5       |
| Day nursery               | 0.2       | 0.1       | 0.7       | 0.6       | 1.6       | 1.1       |
| School                    | 4.3       | 3.8       | 5.1       | 4.1       | 3.4       | 6.6       |
| Work                      | 0.5       | 0.1       | 0.0       | 0.0       | 0.4       | 0.0       |
| Traffic accidents         | 11.3      | 12.7      | 13.2      | 10.4      | 12.2      | 9.0       |
| Bicycle accidents         | 8.1       | 5.3       | 7.4       | 6.5       | 8.4       | 6.7       |
| Pedestrian hit by vehicle | 2.5       | 4.7       | 2.6       | 1.5       | 1.2       | 1.2       |
| Moped, motorcycle         | 0.3       | 1.2       | 1.7       | 1.2       | 1.3       | 1.1       |
| Car passenger             | 0.3       | 1.0       | 0.9       | 1.1       | 0.6       | 0.0       |
| Other                     | 0.1       | 0.5       | 0.6       | 0.1       | 0.8       | 0.0       |
| Playing accidents         | 11.6      | 14.7      | 14.2      | 16.1      | 16.9      | 19.0      |
| Playground                | 2.9       | 3.1       | 3.7       | 3.9       | 6.5       | 8.9       |
| In-lines, skateboard      | 0.1       | 0.1       | 0.2       | 2.1       | 1.9       | 3.9       |
| Sledge, other "snow"      | 0.8       | 0.4       | 1.1       | 1.9       | 1.4       | 1.7       |
| Other playing accidents   | 7.8       | 11.1      | 9.2       | 8.2       | 7.1       | 4.6       |
| Sports accidents          | 11.7      | 13.1      | 17.8      | 20.1      | 21.8      | 27.7      |
| Ball game                 | 3.6       | 5.1       | 8.0       | 9.8       | 10.0      | 17.3      |
| Ice-hockey, skating       | 5.6       | 4.7       | 4.4       | 2.7       | 3.2       | 1.9       |
| Gymnastics and athletics  | 0.6       | 0.7       | 0.6       | 1.0       | 2.6       | 1.5       |
| Horse accidents           | 1.0       | 1.0       | 2.8       | 3.0       | 2.5       | 2.1       |
| Wrestling, boxing, etc.   | 0.2       | 0.6       | 0.7       | 1.4       | 1.7       | 1.2       |
| Skiing                    | 0.4       | 0.6       | 1.0       | 1.9       | 1.2       | 2.8       |
| Other                     | 0.3       | 0.3       | 0.3       | 0.4       | 0.5       | 0.9       |
| Fights                    | 0.9       | 1.7       | 2.9       | 2.4       | 2.9       | 5.4       |
| Other                     | 0.2       | 0.1       | 1.1       | 1.7       | 0.4       | 0.1       |
| Unknown                   | 54.2      | 48.0      | 38.8      | 40.0      | 33.6      | 29.5      |
| <b>TRAUMA MECHANISM</b>   |           |           |           |           |           |           |
| Falls                     | 70        | 74        | 77        | 80        | 67        | 68        |
| On the same plane         | 50        | 50        | 52        | 58        | 41        | 42        |
| Between planes            | 20        | 25        | 25        | 22        | 26        | 26        |
| Animate mechanical forces | 14        | 16        | 17        | 15        | 23        | 24        |
| Unclassifiable            | 0         | 1         | 1         | 1         | 5         | 8         |
| Unknown                   | 16        | 9         | 5         | 5         | 4         | 0         |
